# Supplementary material for: A dopamine D1-like receptor agonist ameliorates stab wound-induced brain injury through its immunosuppressive effect
Source: Research Square preprint supplement (doi:10.21203/rs.3.rs-6726043/v1), 2025-07-28
Supplement: Supplementary file 1 [file 6b1d01a82f4be803b552e81f.docx]

**A dopamine D1-like receptor agonist ameliorates stab wound-induced brain injury through its immunosuppressive effect**

Mohammed E. Choudhury1, 2, *, †, Junya Tanaka1, 2, *, Ayane Takenaga3,, Haruto Yamamoto3, Hiroto Yamauchi1, Naoki Abe1, Noriyuki Miyaue3, Shirabe Matsumoto4, Keisuke Sekiya1, Takeharu Kunieda4, Masahiro Nagai3, and Tasuku Nishihara1

* The authors contributed equally

† Corresponding author; Mohammed E. Choudhury, Email: [mechoudh@m.ehime-u.ac.jp](mailto:mechoudh@m.ehime-u.ac.jp)

**Author details**

1 Department of Anesthesia and Perioperative Medicine, Ehime University Graduate School of Medicine, Toon, Ehime, 791-0295, Japan

2 Department of Molecular and Cellular Physiology, Ehime University Graduate School of Medicine, Toon, Ehime, 791-0295, Japan

3 Department of Clinical Pharmacology and Therapeutics, Ehime University Graduate School of Medicine, Toon, Ehime, 791-0295, Japan

4 Department of Neurosurgery, Ehime University Graduate School of Medicine, Toon, Ehime, 791-0295, Japan

**Supplementary Figure 1.** SKF, a D1-like receptor agonist, suppressed LPS-induced proinflammatory cytokine (TNFa and IL-1b) expression by primary cultured rat microglia (A) and rat peritoneal macrophages (B). *n* = 3. A one-way ANOVA and Tukey’s multiple comparison test. *, **, ***, **** indicate statistical significance at p <0.05, 0.01, 0.001, and 0.0001, respectively.

**Supplementary Figure 2.** ROS-generating cells and pIKK+ cells in the injured tissues of Vcl-treated rats. A) In regards to Figure 4C, confirmation of localization of CD45, DHE-derived fluorescence, and Iba1in a brain section of a Vcl-treated rat. Cells with DHE fluorescence in the injured brain tissues of rats treated with Vcl. Red arrows denote Iba1+/CD45- cells with ramified processes that did not bear red DHE fluorescence. Iba1+/CD45+ macrophages denoted with blue arrows were negative to weakly positive for DHE fluorescence. B) In regards to Figure 4H, confirmation of localization of pIKK, CD11b, and NeuN in a brain section of a Vcl-treated rat. Red arrows resident microglia with ramified processes appeared pIKK-. Macrophages denoted with blue arrows were pIKK+. CD11b-/pIKK+ cells are denoted with violet arrows.

**Supplementary Figure 3.** Suppressive effects of SKF on metabolic activities of primary rat cultured microglia (A) and rat peritoneal macrophages (B) as revealed by a flux analyzer. SKF reduced both anerobic (ECAR) and aerobic (mitochondrial respiration) metabolism.
